# Supplementary material
Source: PubMed Central journal article supplement (PMC8612754)

# Supplementary Fig. S1

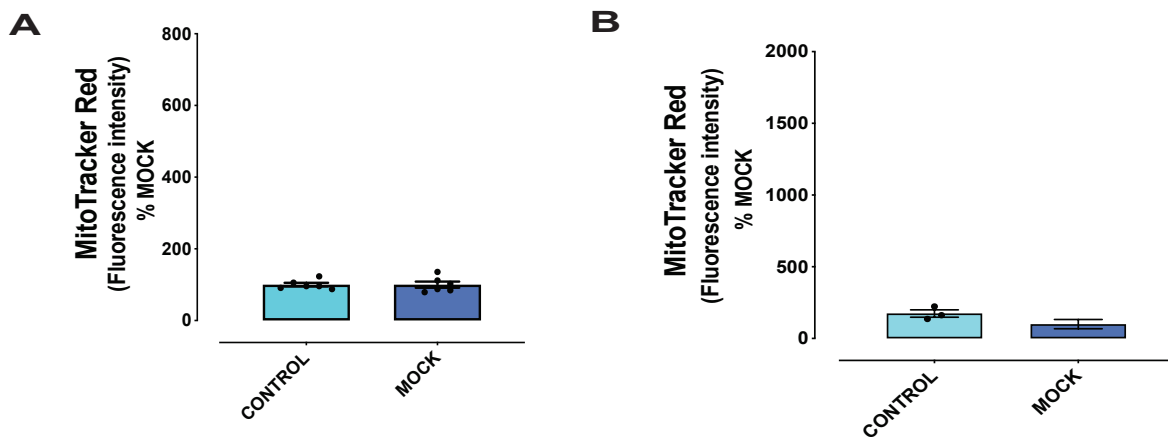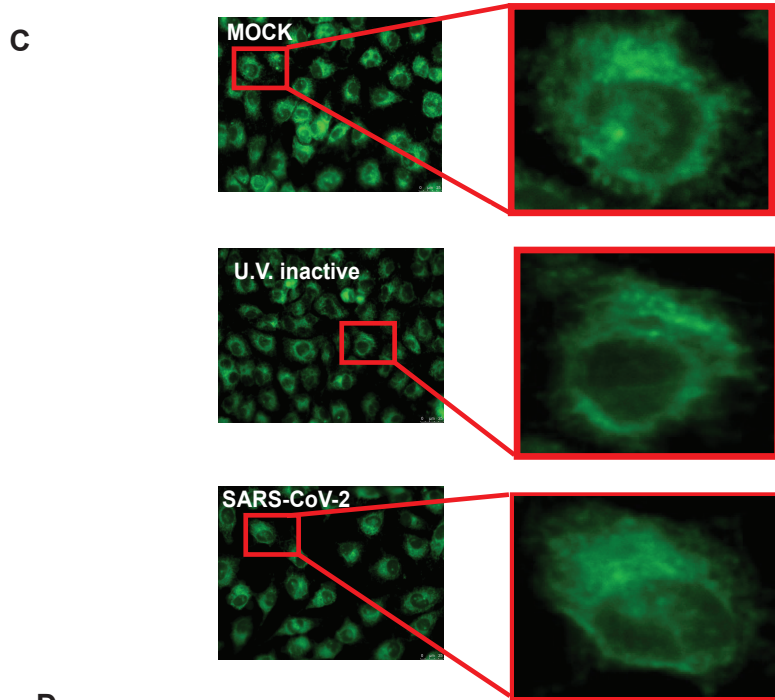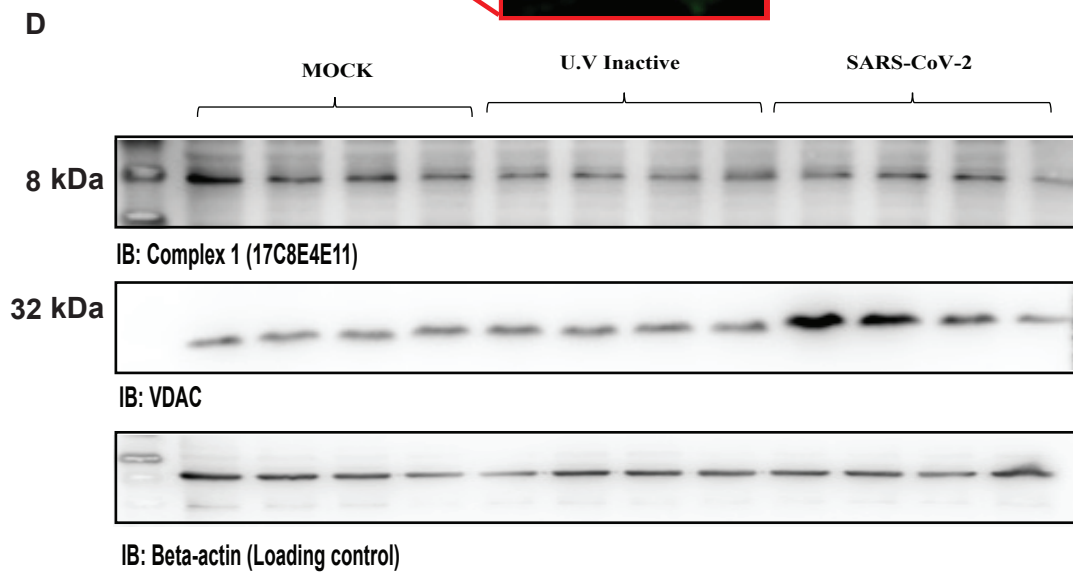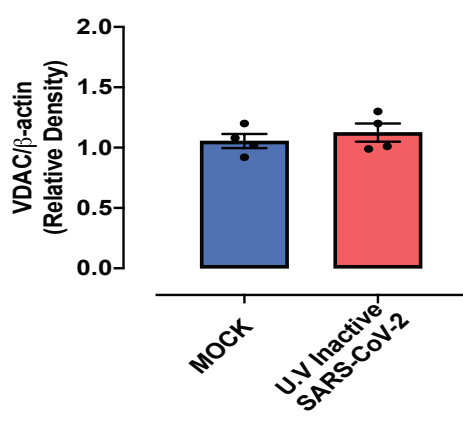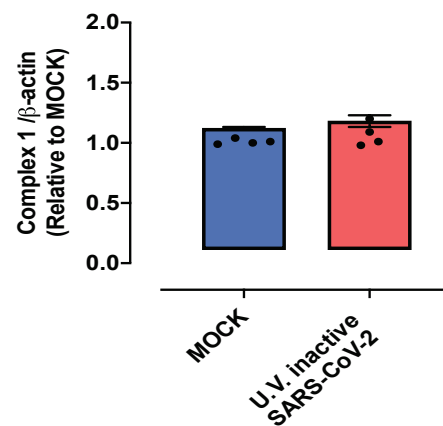

# Supplementary Fig. S2

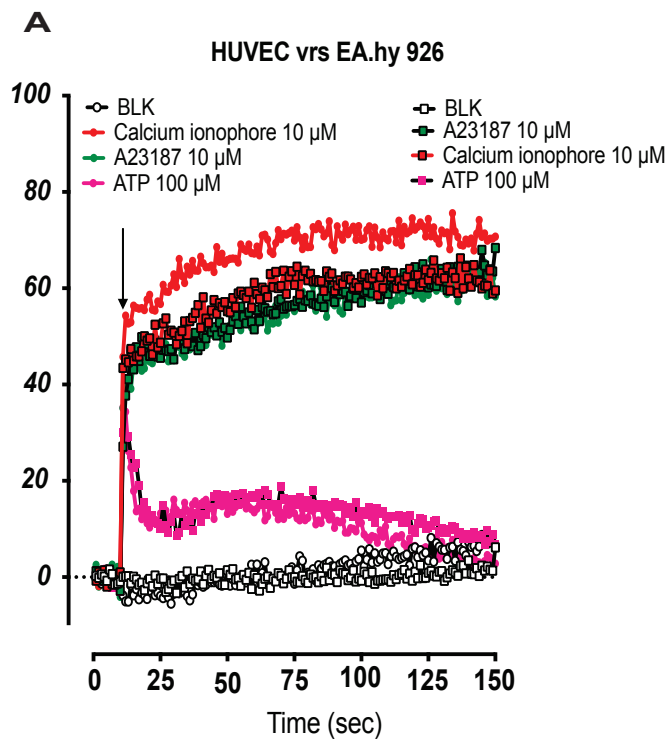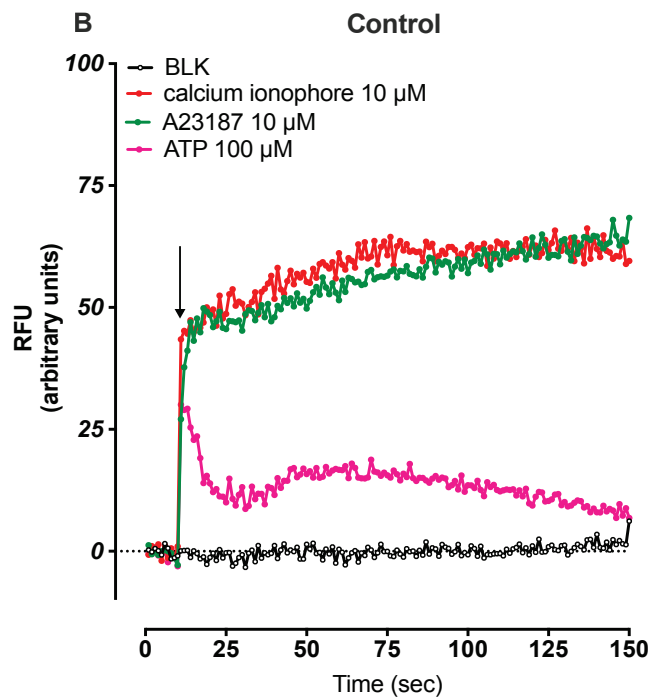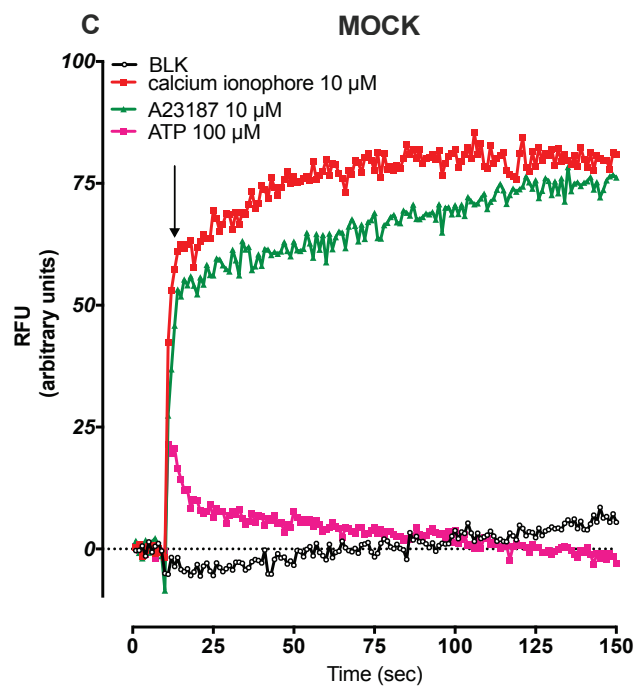

**Supplementary Fig. S3**

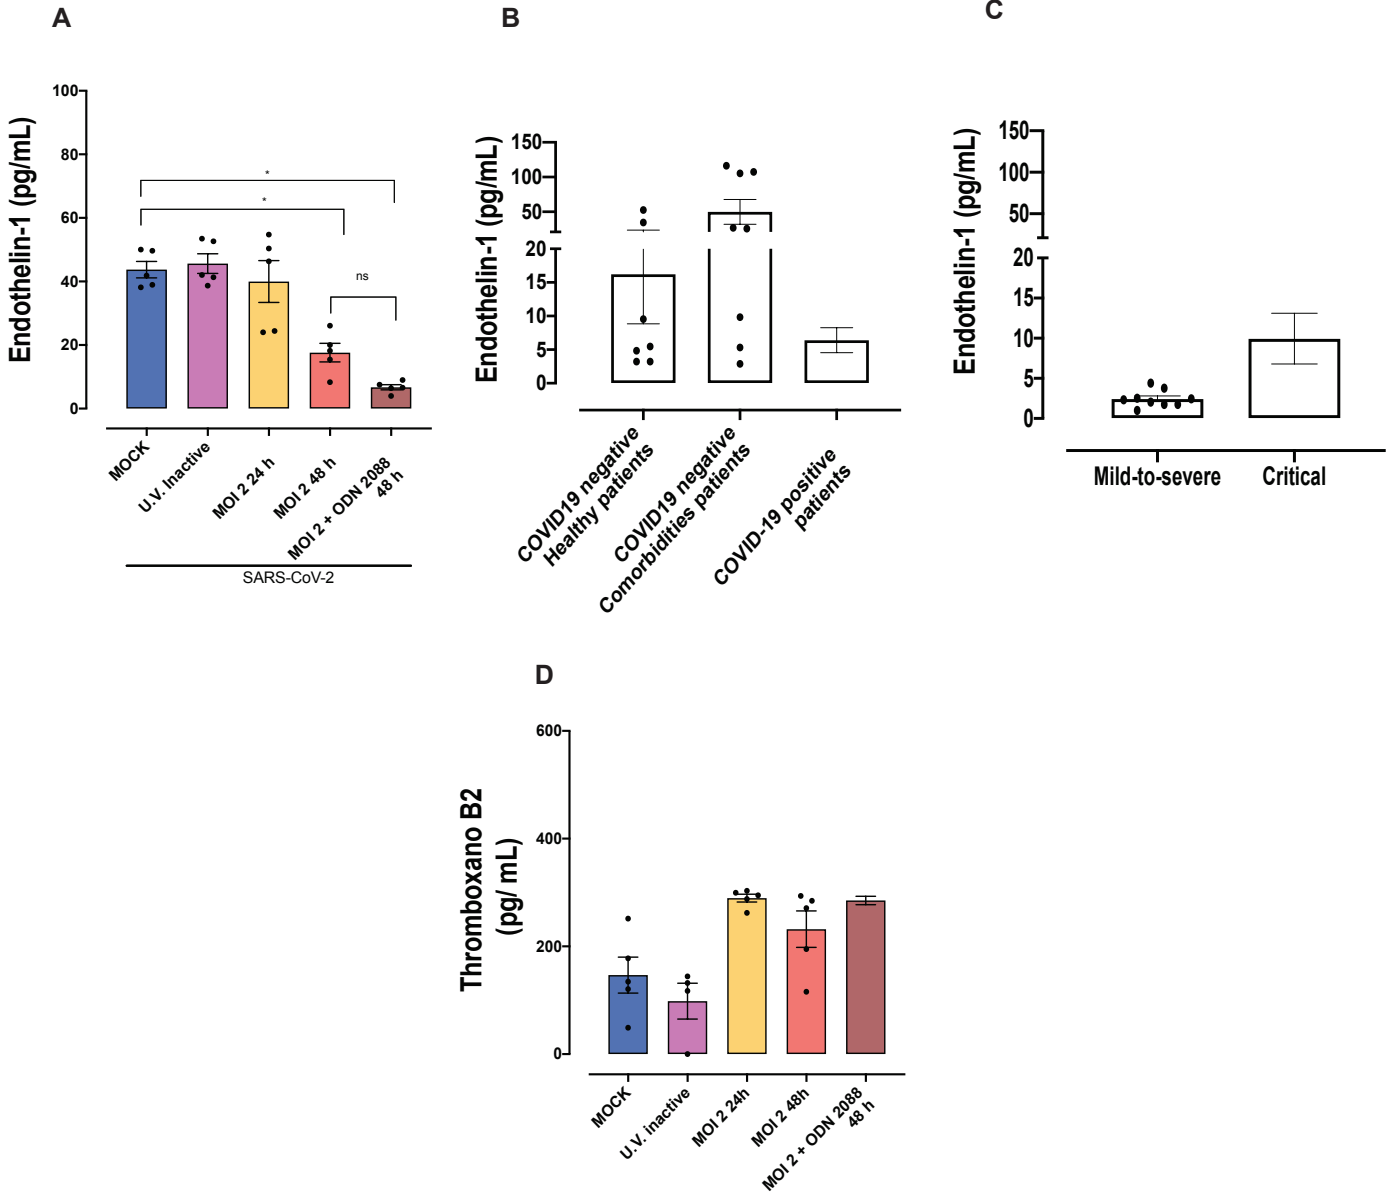

Supplement: mmc1.pdf [file mmc1.pdf]
